# Supplementary material for: High piezoelectric property with exceptional stability in self-poled ferroelectric films
Source: PubMed Central journal article supplement — Nat Commun. 2024 Dec 30;15:10798. doi: 10.1038/s41467-024-54707-y (PMC11685493; doi:10.1038/s41467-024-54707-y), 2024-12-30
Supplement: 41467_2024_54707_MOESM2_ESM.pdf [file 41467_2024_54707_MOESM2_ESM.pdf]

## **Description of Additional Supplementary Files**

**Supplementary Movie 1:** Validation of direct piezoelectric measurement using PZT ceramics on the Piezotest PM300 and the current testing instrument.
